# Supplementary material for: Characterisation of Anopheles strains used for laboratory screening of new vector control products
Source: PubMed Central journal article supplement (PMC6833243; doi:10.1186/s13071-019-3774-3), 2019-11-05
Supplement: 13071_2019_3774_MOESM1_ESM.pdf [file 13071_2019_3774_MOESM1_ESM.pdf]

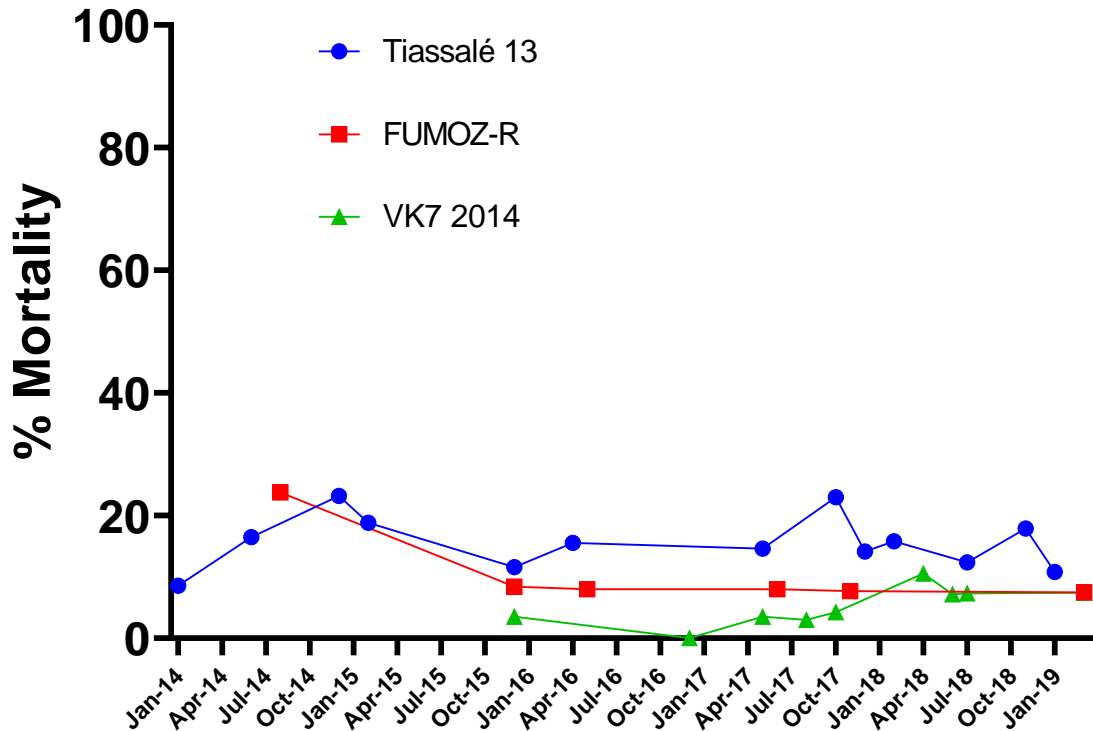

**Additional file 1: Figure S1.** Selection (0.05% Deltamethrin) data over time. WHO tube bioassay 24 hour % mortality.
