# Supplementary material for: Characterisation of Anopheles strains used for laboratory screening of new vector control products
Source: PubMed Central journal article supplement (PMC6833243; doi:10.1186/s13071-019-3774-3), 2019-11-05
Supplement: 13071_2019_3774_MOESM2_ESM.pdf [file 13071_2019_3774_MOESM2_ESM.pdf]

## Tiassalé 13 *An. coluzzii* and *An. gambiae* % species proportion

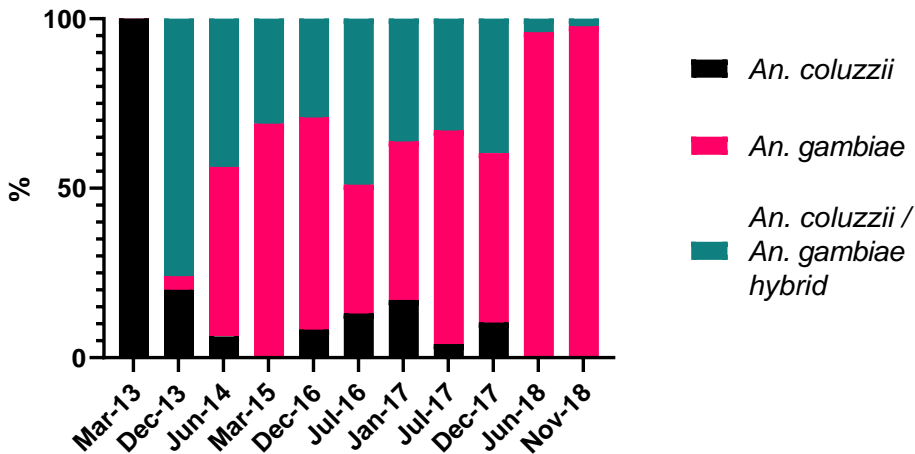

## Tiassalé 2 *An. coluzzii* and *An. gambiae* % species proportion

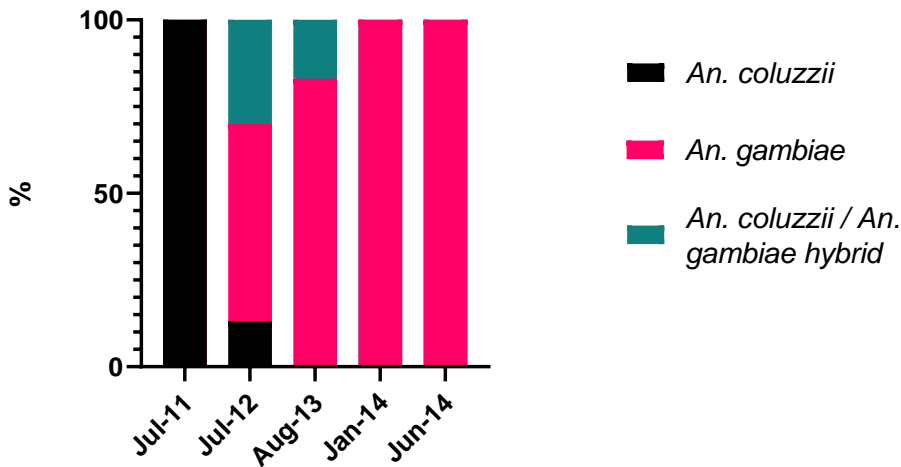

**Additional file 2: Figure S2.** Proportion of *An. coluzzii* and *An. gambiae* in Tiassalé colonies over time.
