# Supplementary material for: Characterisation of Anopheles strains used for laboratory screening of new vector control products
Source: PubMed Central journal article supplement (PMC6833243; doi:10.1186/s13071-019-3774-3), 2019-11-05
Supplement: 13071_2019_3774_MOESM4_ESM.pdf [file 13071_2019_3774_MOESM4_ESM.pdf]

### Cayman F1534C kdr genotype frequencies

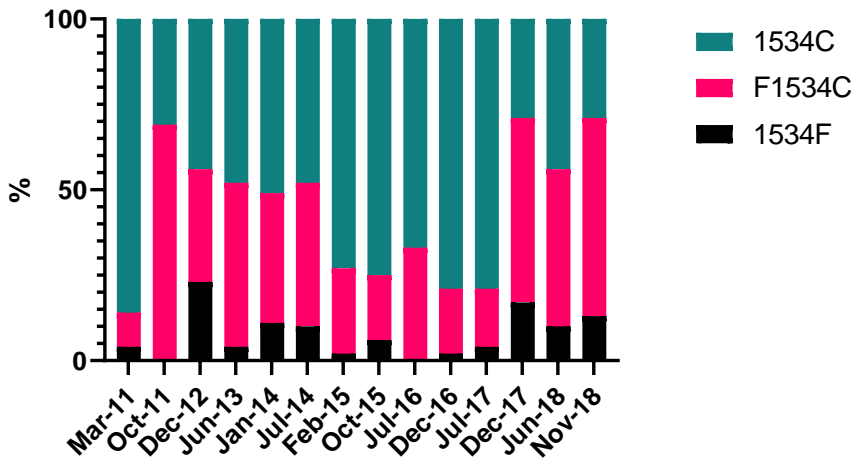

### Cayman V1016I kdr genotype frequencies

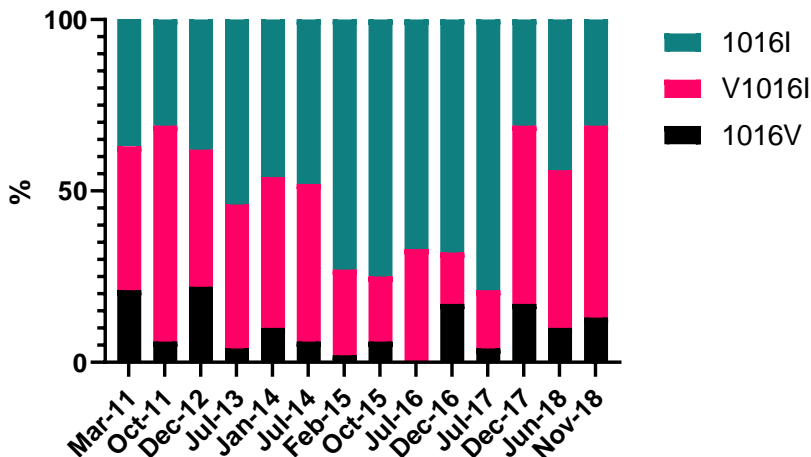

**Additional file 4: Figure S3.** Genotype frequency of two amino acid substitutions in the voltage gated sodium channel in the Cayman population, a pyrethroid resistant strains of *Aedes aegypti*, maintained in LITE. The susceptible strain New Orleans (not shown) has remained fully homozygous wildtype since March 2011.
