# Supplementary material for: Characterisation of Anopheles strains used for laboratory screening of new vector control products
Source: PubMed Central journal article supplement (PMC6833243; doi:10.1186/s13071-019-3774-3), 2019-11-05
Supplement: 13071_2019_3774_MOESM7_ESM.pdf [file 13071_2019_3774_MOESM7_ESM.pdf]

**Additional file 7: Table S3.** Additional genotype (%) and allele frequencies for extra diagnostic SNPs.

| Strain               | Genotype (%)     |                   |                 | Allele frequency | Date of last screening |
|----------------------|------------------|-------------------|-----------------|------------------|------------------------|
| <b>2LA Inversion</b> | 2L+a (wild type) | 2La/2L+a (hetero) | 2La (inversion) |                  |                        |
| Kisumu               | 48               | 35                | 17              | 0.6              | Apr 2013               |
| Tiassalé 13          | 45               | 11                | 44              | 0.7              | Mar 2013               |
| Moz                  | 100              | 0                 | 0               | 0                | Jul 2013               |
| <b>GSTe2 114</b>     | II (wild type)   | IT (hetero)       | TT (mutant)     |                  |                        |
| Kisumu               | 15               | 64                | 21              | 0.5              | Apr 2013               |
| Tiassalé 13          | 73               | 27                | 0               | 0.1              | Mar 2013               |
| FUMOZ-R              | 100              | 0                 | 0               | 0                | Feb 2014               |
